# Supplementary material for: Integrated proteomic and metabolomic analysis reveals that rhodomyrtone reduces the capsule in Streptococcus pneumoniae
Source: PubMed Central journal article supplement (PMC5457420; doi:10.1038/s41598-017-02996-3), 2017-06-02
Supplement: 41598_2017_2996_MOESM1_ESM.pdf [file 41598_2017_2996_MOESM1_ESM.pdf]

**Integrated proteomic and metabolomic analysis reveals that rhodomyrtone reduces the capsule in *Streptococcus pneumoniae***

Watcharapong Mitsuwan<sup>1</sup>, Alfonso Olaya-Abril<sup>2</sup>, Mónica Calderón-Santiago<sup>3</sup>, Irene Jiménez-Munguía<sup>2</sup>, José Antonio González-Reyes<sup>4</sup>, Feliciano Priego-Capote<sup>3</sup>, Supayang P. Voravuthikunchai<sup>1</sup>, Manuel J. Rodríguez-Ortega<sup>2\*</sup>

<sup>1</sup>Department of Microbiology and Excellent Research Laboratory on Natural Products, Faculty of Science and Natural Product Research Center of Excellence Prince of Songkla University, Songkhla, Thailand

<sup>2</sup>Departamento de Bioquímica y Biología Molecular, Universidad de Córdoba; Campus de Excelencia Internacional CeiA3, Córdoba, Spain

<sup>3</sup>Departamento de Química Analítica, Universidad de Córdoba; Campus de Excelencia Internacional CeiA3, Córdoba, Spain

<sup>4</sup>Departamento de Biología Celular, Fisiología e Inmunología, Universidad de Córdoba; Campus de Excelencia Internacional CeiA3, Córdoba, Spain

\*Corresponding author:

Manuel J. Rodríguez-Ortega

Address: Departamento de Bioquímica y Biología Molecular, Edificio “Severo Ochoa” planta baja, Campus de Rabanales, Universidad de Córdoba. 14071 Córdoba, Spain.

Tel: +34 957 218519

Fax: +34 957 218856

E-mail: [mjrodriguez@uco.es](mailto:mjrodriguez@uco.es)

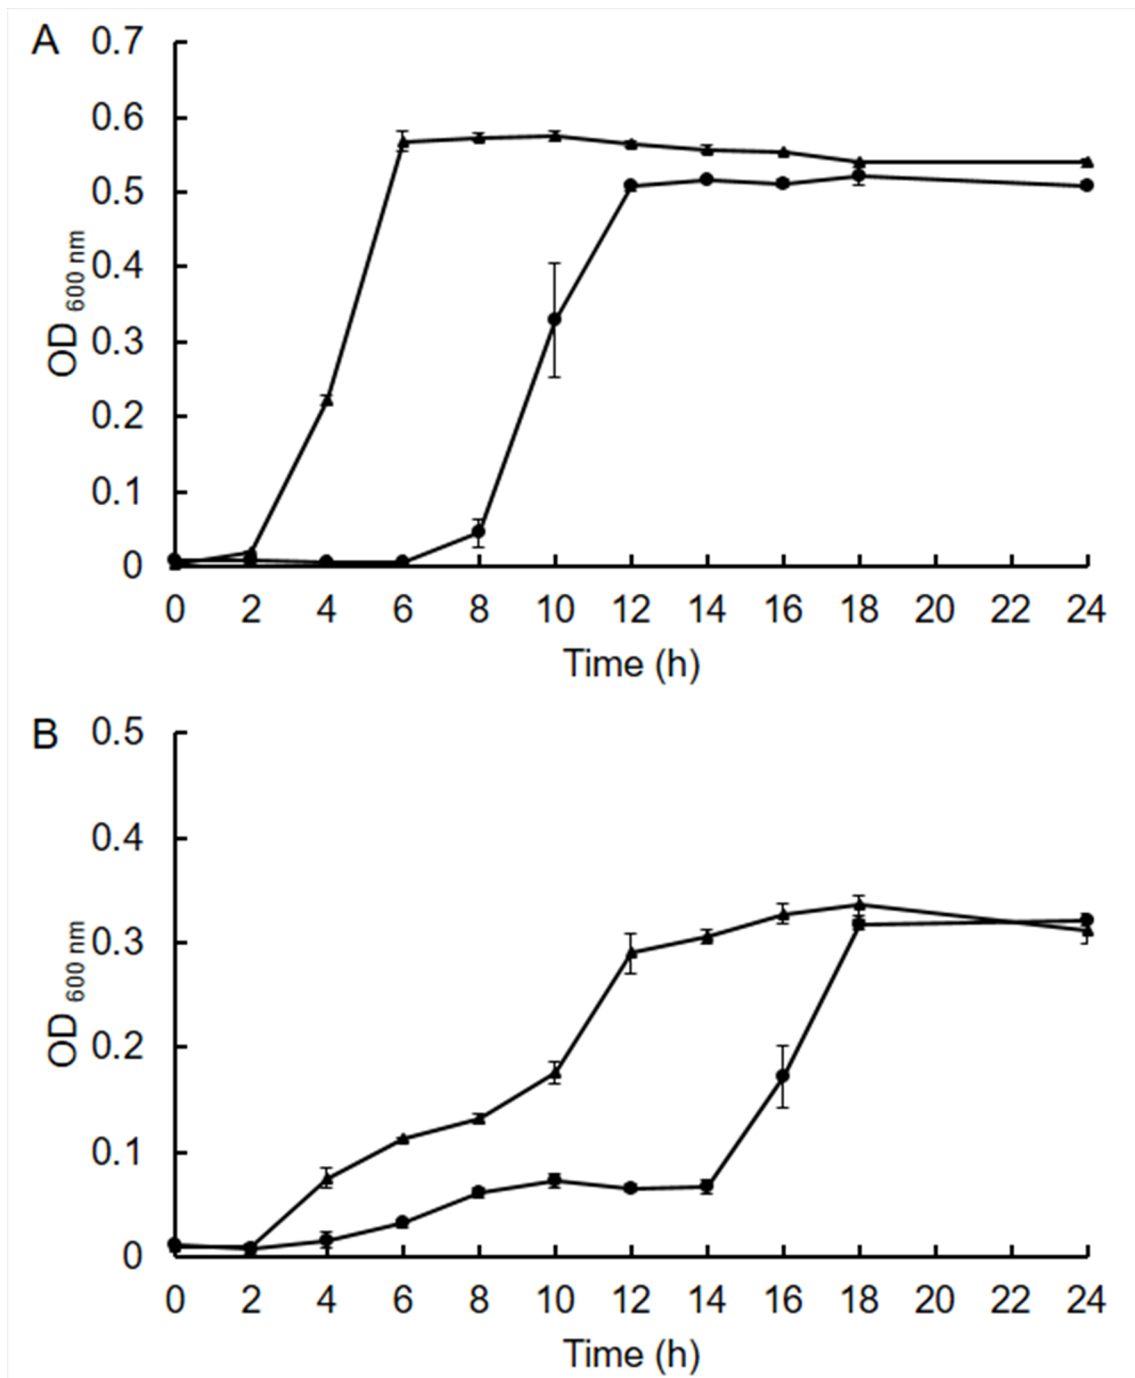

Figure S1. Growth curves of *Streptococcus pneumoniae* strains TIGR4 (A) and R6 (B) in the presence (●) or absence of rhodomlyrtone at  $0.5 \times \text{MIC}$  (▲). 1% DMSO was used as negative control.

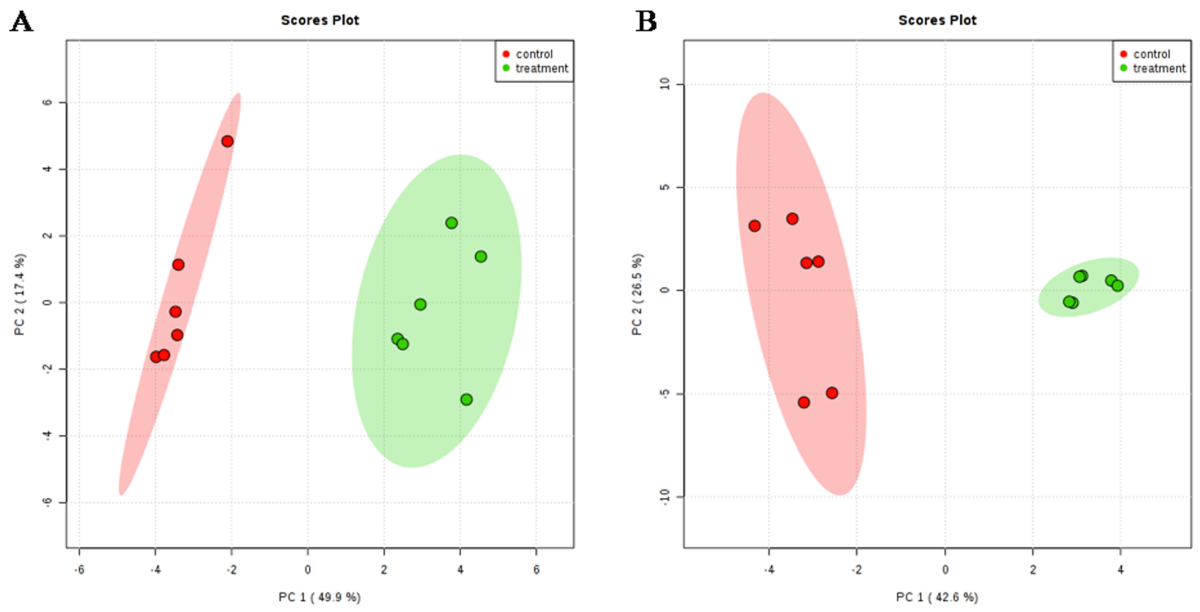

Figure S2. Principal component analysis of the metabolite profile of *Streptococcus pneumoniae* strains TIGR4 (A) and R6 (B) treated with  $0.5 \times$  MIC purified rhodomyrone.

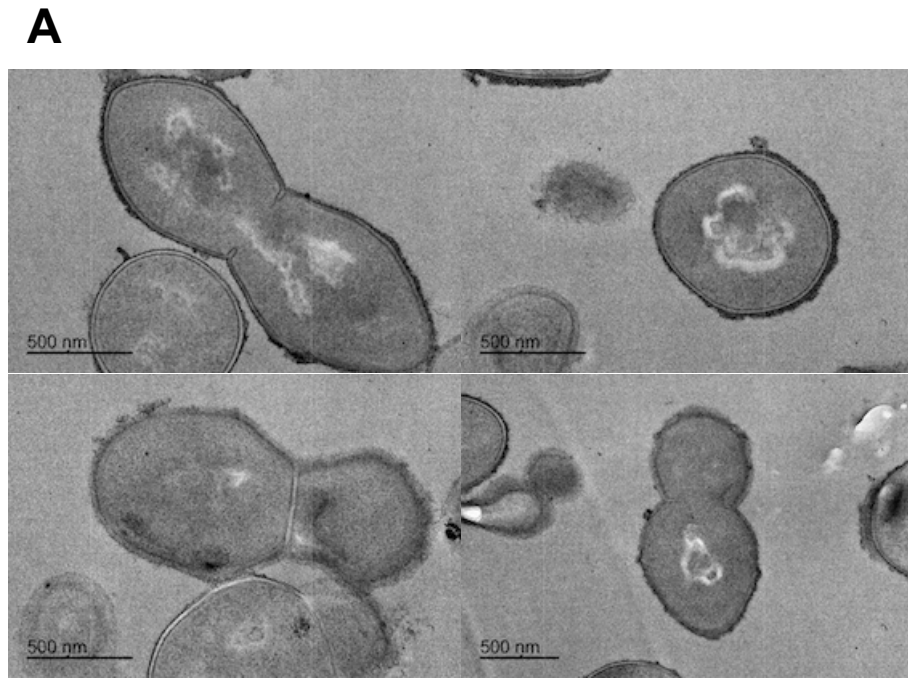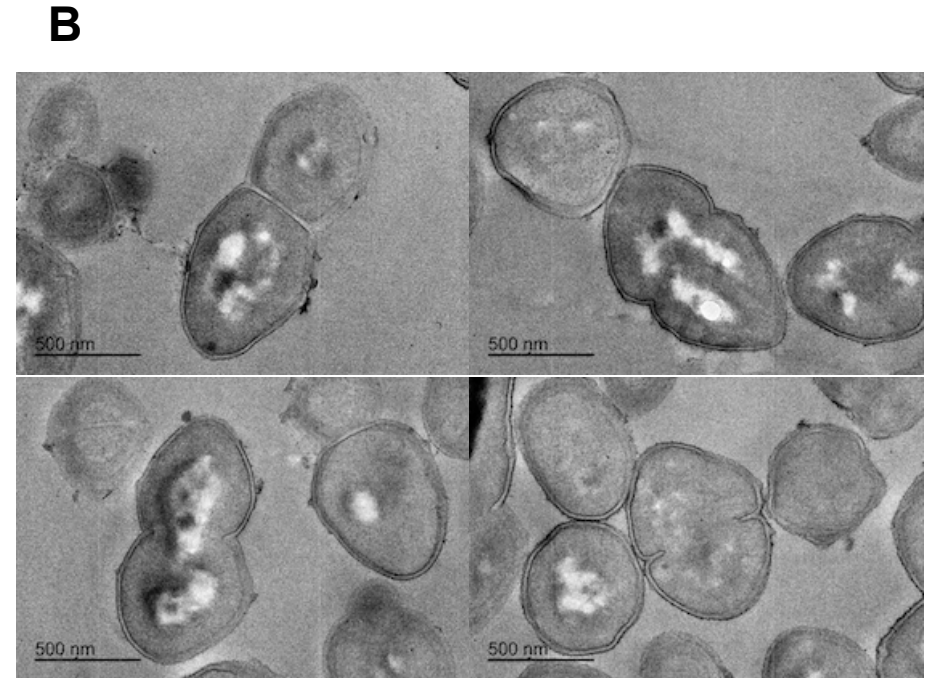

Figure S3. Transmission electron micrographs of *Streptococcus pneumoniae* TIGR4 controls in the absence (A) and in the presence of 0.5 × MIC purified rhodomirtone (B).

**A**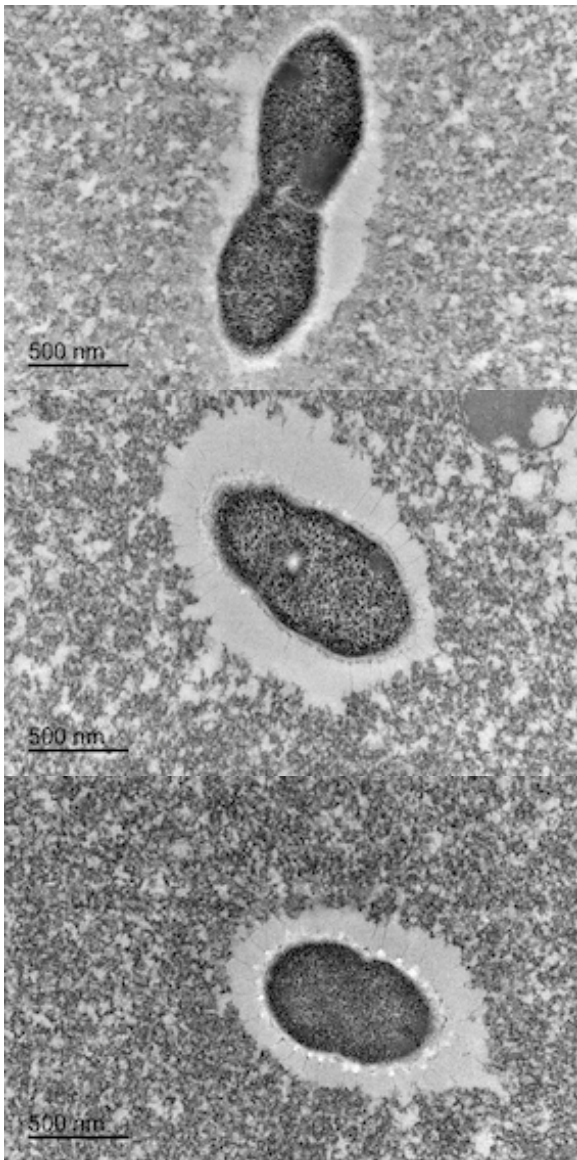**B**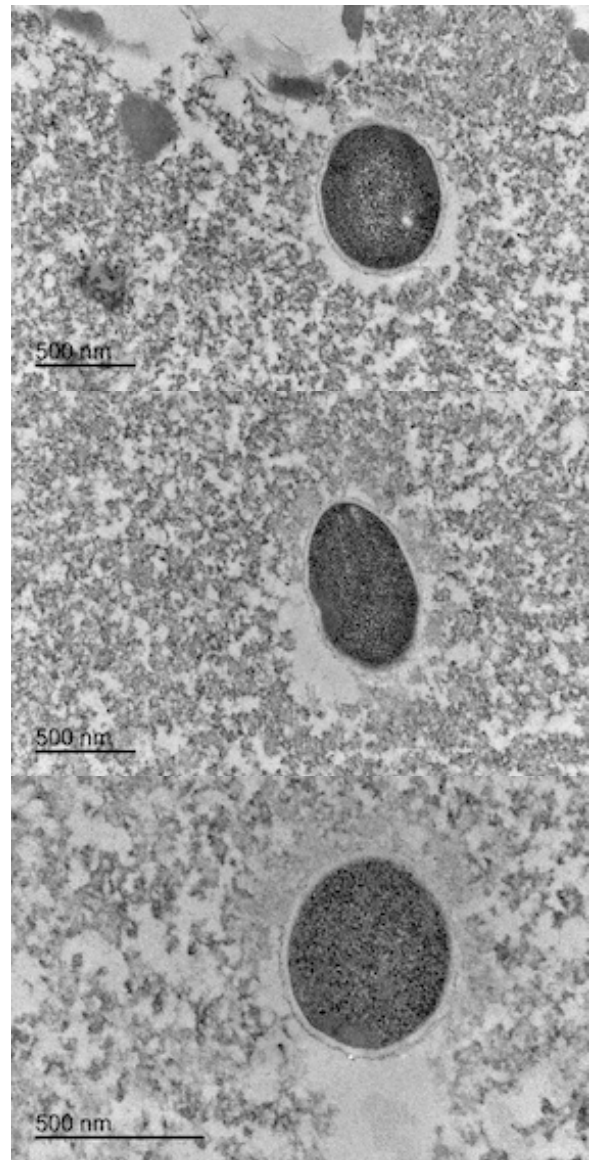

Figure S4. Transmission electron micrographs of *Streptococcus pneumoniae* 56H controls in the absence (A) and in the presence of 0.5 x MIC purified rhodomirtone (B).

Table S1. Minimal inhibitory concentration (MIC) and minimal bactericidal concentration (MBC) of *Rhodomyrtus tomentosa* ethanol extract, purified rhodomyrtone, and synthetic rhodomyrtone against *Streptococcus pneumoniae* clinical isolates.

| Isolates | serotype | origin | MIC/MBC ( $\mu\text{g/ml}$ ) |                       |                        |              |
|----------|----------|--------|------------------------------|-----------------------|------------------------|--------------|
|          |          |        | Ethanol extract              | Purified rhodomyrtone | Synthetic rhodomyrtone | Erythromycin |
| 1H       | -        | -      | 64/128                       | 2/2                   | 2/2                    | 0.03/0.03    |
| 3H       | 9V       | blood  | 64/128                       | 1/1                   | 2/2                    | 0.03/0.03    |
| 6H       | 23F      | blood  | 64/256                       | 2/4                   | 2/4                    | 2/4          |
| 12F      | -        | -      | 64/128                       | 1/1                   | 2/4                    | 0.03/0.06    |
| 29H      | 19F      | blood  | 64/256                       | 2/4                   | 2/4                    | 0.25/0.25    |
| 49H      | 19A      | blood  | 256/512                      | 4/4                   | 4/4                    | 0.03/0.125   |
| 52H      | 3        | PF     | 64/512                       | 1/4                   | 2/4                    | 0.25/0.5     |
| 56H      | 19A      | blood  | 32/64                        | 0.5/1                 | 0.5/2                  | 0.06/0.06    |
| 56H.2P   | -        | -      | 32/128                       | 0.5/2                 | 0.5/2                  | 0.06/0.06    |
| 57H      | 18C      | blood  | 16/16                        | 0.125/0.125           | 0.125/0.25             | 0.03/0.03    |
| 65H      | 6B       | blood  | 128/256                      | 2/4                   | 2/4                    | 0.25/1       |
| 80H      | 3        | PF     | 64/256                       | 1/2                   | 2/4                    | 0.06/0.06    |
| 83H      | 1        | PF     | 64/64                        | 2/2                   | 2/4                    | 0.03/0.06    |

|            |       |       |         |         |         |             |
|------------|-------|-------|---------|---------|---------|-------------|
| 84H        | 6A    | blood | 64/128  | 2/2     | 2/2     | 0.03/0.06   |
| 87H        | 18C   | CSF   | 32/64   | 0.5/1   | 0.5/1   | 0.03/0.03   |
| 89H        | -     | -     | 128/512 | 4/4     | 4/4     | 0.03/0.06   |
| 99H        | 7     | blood | 64/128  | 2/4     | 2/4     | 0.125/0.125 |
| 5104-8     | 8     | -     | 64/128  | 1/2     | 1/2     | 0.03/0.06   |
| 5278-14    | 14    | -     | 64/256  | 0.5/1   | 0.5/1   | 0.125/0.125 |
| 5334-8     | 8     | -     | 128/512 | 2/4     | 2/4     | 0.03/0.06   |
| 5335-5     | 5     | -     | 64/64   | 2/2     | 2/2     | 0.5/0.5     |
| 5335-19A   | 19A   | -     | 64/128  | 0.5/0.5 | 0.5/0.5 | 0.03/0/03   |
| 5533-19A   | 19A   | -     | 64/256  | 0.5/0.5 | 0.5/0.5 | 0.03/0.03   |
| TIGR4      | 4     | -     | 256/512 | 2/8     | 4/4     | 0.25/0.25   |
| R6         | 2     | -     | 64/256  | 1/2     | 2/4     | 0.25/1      |
| ATCC700763 | 19A-6 |       | 32/128  | 0.5/1   | 1/4     | 0.125/0.25  |

---
